# Supplementary material for: Insights into rumen microbial biosynthetic gene cluster diversity through genome-resolved metagenomics
Source: PubMed Central journal article supplement (PMC8241843; doi:10.1038/s42003-021-02331-7), 2021-06-29
Supplement: 42003_2021_2331_MOESM2_ESM.pdf [file 42003_2021_2331_MOESM2_ESM.pdf]

## **SUPPLEMENTARY INFORMATION**

### **Insights into rumen microbial biosynthetic gene cluster diversity through genome-resolved metagenomics**

Christopher L. Anderson<sup>1</sup> and Samodha C. Fernando\*<sup>1</sup>

<sup>1</sup>Department of Animal Science, University of Nebraska, Lincoln, NE 68583

\*Corresponding author: Samodha C. Fernando (samodha@unl.edu)

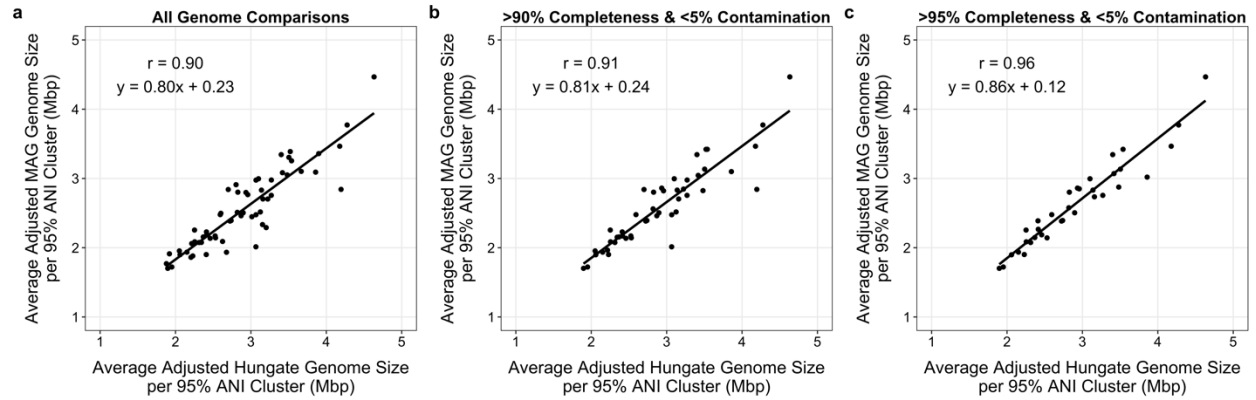

**Supplementary Figure 1: The genome sizes of MAGs are largely congruent with genome sizes of isolates from the Hungate1000 Collection in the same 95% ANI cluster. Pearson correlation and linear regression analysis were calculated to compare the average adjusted genome size for all MAGs and Hungate1000 genomes<sup>1</sup> of the same 95% ANI cluster (a), those genomes with  $\geq 90\%$  completeness and  $\leq 5\%$  contamination from the same 95% ANI cluster (b), and those genomes with  $\geq 95\%$  completeness and  $\leq 5\%$  contamination from the same 95% ANI cluster (c).**

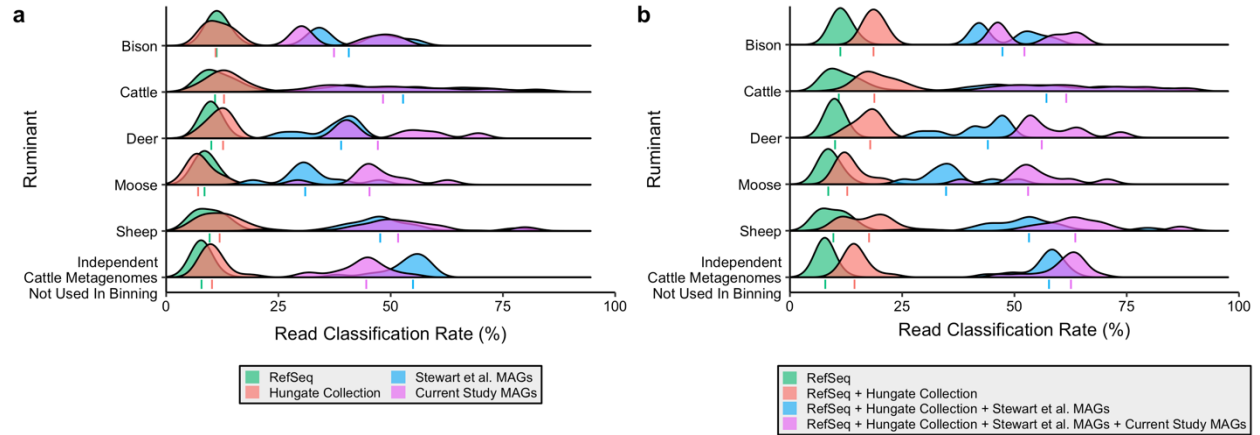

**Supplementary Figure 2: Rumen MAGs improve metagenomic classification.** Classification rates of reads from the 412 metagenomes used to bin MAGs and 16 cattle metagenomes not applied in genome binning using a combination of genomes from RefSeq, the Hungate1000 Collection<sup>1</sup>, Stewart *et al.* studies<sup>2,3</sup>, and the current study as databases. The four genomic databases were utilized to classify reads independently (**a**) or used to incrementally build larger databases for classification (**b**). A database including rumen MAGs from the Stewart *et al.* studies and the current study improved classifications rates for bison, cattle, deer, moose, sheep, and independent cattle metagenomes a median 33.3%, 42.1%, 40.9%, 40.1%, 45.0%, and 46.8% compared to a database of mainly isolate genomes from RefSeq and the Hungate1000 collection. The lines denote the median proportions of sample reads classified by the dataset or combinations of datasets.

**Supplementary Table 1: Characteristics and sources of rumen metagenomic datasets used for the reconstruction of MAGs.**

| Ruminant            | QC Bases (Gbp) | Samples | Database        | Accession                                                                                                                                                                                                                                                                                                                                                     | Publication   |
|---------------------|----------------|---------|-----------------|---------------------------------------------------------------------------------------------------------------------------------------------------------------------------------------------------------------------------------------------------------------------------------------------------------------------------------------------------------------|---------------|
| Bison               | 52.3           | 8       | NCBI BioProject | PRJNA214227                                                                                                                                                                                                                                                                                                                                                   | NA            |
| Cattle              | 22.8           | 16      | NCBI BioProject | PRJNA627251                                                                                                                                                                                                                                                                                                                                                   | Current Study |
| Cattle              | 43.5           | 27      | NCBI BioProject | PRJNA627299                                                                                                                                                                                                                                                                                                                                                   | Current Study |
| Cattle              | 33.3           | 23      | NCBI BioProject | PRJNA627299                                                                                                                                                                                                                                                                                                                                                   | Current Study |
| Cattle              | 166.0          | 1       | NCBI BioProject | PRJNA60251                                                                                                                                                                                                                                                                                                                                                    | 4             |
| Cattle              | 85.1           | 8       | NCBI BioProject | PRJEB10338                                                                                                                                                                                                                                                                                                                                                    | 5             |
| Cattle              | 52.7           | 64      | MG-RAST         | mgp4126                                                                                                                                                                                                                                                                                                                                                       | 6             |
| Cattle              | 12.5           | 14      | NCBI BioProject | PRJEB8939                                                                                                                                                                                                                                                                                                                                                     | 7             |
| Cattle              | 60.6           | 9       | NCBI BioProject | PRJNA322715                                                                                                                                                                                                                                                                                                                                                   | 8             |
| Cattle              | 4.8            | 1       | NCBI BioProject | PRJNA270714                                                                                                                                                                                                                                                                                                                                                   | 9             |
| Cattle              | 20.9           | 2       | NCBI BioProject | PRJNA291523                                                                                                                                                                                                                                                                                                                                                   | 10            |
| Cattle              | 125.0          | 16      | NCBI BioProject | PRJNA214227                                                                                                                                                                                                                                                                                                                                                   | NA            |
| Cattle              | 666.0          | 42      | NCBI BioProject | PRJEB21624                                                                                                                                                                                                                                                                                                                                                    | 2             |
| Cattle              | 73.0           | 7       | NCBI BioProject | PRJNA319009                                                                                                                                                                                                                                                                                                                                                   | 11            |
| Cattle              | 762.7          | 82      | NCBI BioProject | PRJEB23561                                                                                                                                                                                                                                                                                                                                                    | 12            |
| Deer (White-tailed) | 34.2           | 4       | NCBI BioProject | PRJNA214227                                                                                                                                                                                                                                                                                                                                                   | NA            |
| Deer (Red)          | 28.6           | 4       | NCBI BioProject | PRJNA214227                                                                                                                                                                                                                                                                                                                                                   | NA            |
| Moose               | 40.9           | 3       | NCBI BioProject | PRJNA301235                                                                                                                                                                                                                                                                                                                                                   | 13            |
| Moose               | 67.9           | 6       | NCBI BioProject | PRJEB12797                                                                                                                                                                                                                                                                                                                                                    | 14            |
| Sheep               | 113.5          | 16      | NCBI BioProject | PRJNA214227                                                                                                                                                                                                                                                                                                                                                   | 15            |
| Sheep               | 118.3          | 39      | MG-RAST         | mgp7948, mgp7949, mgp7950, mgp7957, mgp7958, mgp7959, mgp7960, mgp7961, mgp7962, mgp7963, mgp7964, mgp7965, mgp7966, mgp7967, mgp7968, mgp7969, mgp7970, mgp7974, mgp7975, mgp8090, mgp8091, mgp8092, mgp8093, mgp8094, mgp8095, mgp8096, mgp8097, mgp8098, mgp8099, mgp8108, mgp8109, mgp8110, mgp8111, mgp8112, mgp8113, mgp8114, mgp8115, mgp8116, mgp8117 | 16            |
| Sheep               | 656.5          | 20      | NCBI BioProject | PRJNA202380                                                                                                                                                                                                                                                                                                                                                   | 17            |

## Supplementary References

1. Seshadri, R. *et al.* Cultivation and sequencing of rumen microbiome members from the Hungate1000 Collection. *Nature Biotechnology* **36**, 359–367 (2018).
2. Stewart, R. D. *et al.* Assembly of 913 microbial genomes from metagenomic sequencing of the cow rumen. *Nature Communications* **9**, 870 (2018).
3. Stewart, R. D. *et al.* Compendium of 4,941 rumen metagenome-assembled genomes for rumen microbiome biology and enzyme discovery. *Nature Biotechnology* **37**, 953–961 (2019).
4. Hess, M. *et al.* Metagenomic Discovery of Biomass-Degrading Genes and Genomes from Cow Rumen. *Science* **331**, 463–467 (2011).
5. Wallace, R. J. *et al.* The rumen microbial metagenome associated with high methane production in cattle. *BMC Genomics* **16**, 839 (2015).
6. Ross, E. M. *et al.* High throughput whole rumen metagenome profiling using untargeted massively parallel sequencing. *BMC Genetics* **13**, 53 (2012).
7. Rubino, F. *et al.* Divergent functional isoforms drive niche specialisation for nutrient acquisition and use in rumen microbiome. *The ISME Journal* **11**, 932–944 (2017).
8. Li, W. *et al.* Metagenomic analysis reveals the influences of milk containing antibiotics on the rumen microbes of calves. *Arch Microbiol* **199**, 433–443 (2017).
9. Kishi, L. T., Jesus, R. B. de, Pavani, C. D., Lemos, E. G. M. & Souza, J. A. M. de. Metagenomic Assembly and Draft Genome Sequence of an Uncharacterized *Prevotella* sp. from Nelore Rumen. *Genome Announc.* **3**, (2015).
10. Taxis, T. M. *et al.* The players may change but the game remains: network analyses of ruminal microbiomes suggest taxonomic differences mask functional similarity. *Nucleic Acids Research* **43**, 9600–9612 (2015).

11. Campanaro, S. *et al.* In vitro fermentation of key dietary compounds with rumen fluid: A genome-centric perspective. *Science of The Total Environment* **584–585**, 683–691 (2017).
12. Li, J. *et al.* A catalog of microbial genes from the bovine rumen unveils a specialized and diverse biomass-degrading environment. *GigaScience* **9**, (2020).
13. Solden, L. M. *et al.* New roles in hemicellulosic sugar fermentation for the uncultivated Bacteroidetes family BS11. *The ISME Journal* **11**, 691–703 (2017).
14. Svartström, O. *et al.* Ninety-nine de novo assembled genomes from the moose ( *Alces alces* ) rumen microbiome provide new insights into microbial plant biomass degradation. *The ISME Journal* **11**, 2538–2551 (2017).
15. Ellison, M. J. *et al.* Diet Alters Both the Structure and Taxonomy of the Ovine Gut Microbial Ecosystem. *DNA Research* **21**, 115–125 (2014).
16. Li, R. W. *et al.* Metagenomic Insights into the RDX-Degrading Potential of the Ovine Rumen Microbiome. *PLOS ONE* **9**, e110505 (2014).
17. Shi, W. *et al.* Methane yield phenotypes linked to differential gene expression in the sheep rumen microbiome. *Genome Res.* **24**, 1517–1525 (2014).
