# Supplementary material for: Insights into rumen microbial biosynthetic gene cluster diversity through genome-resolved metagenomics
Source: PubMed Central journal article supplement (PMC8241843; doi:10.1038/s42003-021-02331-7), 2021-06-29
Supplement: 42003_2021_2331_MOESM3_ESM.pdf [file 42003_2021_2331_MOESM3_ESM.pdf]

## Description of Additional Supplementary Files

**File Name:** Supplementary Data 1

**Description:** Taxonomy and genomic properties of recovered rumen MAGs. (xlsx)

**File Name:** Supplementary Data 2

**Description:** Results from the clustering of MAGs from the current study, the Hungate1000 Collection, and Stewart et al. studies based on 95% ANI thresholds with dRep. (xlsx)

**File Name:** Supplementary Data 3

**Description:** BGC predictions for MAGs presented in the current study, genomes from the Hungate1000 Collection, and MAGs from the Stewart et al. studies. (xlsx)

**File Name:** Supplementary Data 4

**Description:** Nodes and edges of the relational network based on BiG-SCAPE defined similarity between NRPS gene clusters of Bacteroidota, Firmicutes, and Euryarchaeota. (xlsx)

**File Name:** Supplementary Data 5

**Description:** Genome-specific normalized counts and DESeq2 results for 648 BGCs with at least 100 reads and encoded by genomes with at least one read in all 20 metatranscriptomes. (xlsx)

**File Name:** Supplementary Data 6

**Description:** Phylogenetic tree of 1,163 near-complete bacterial MAGs recovered in the current study. (Newick)

**File Name:** Supplementary Data 7

**Description:** Phylogenetic tree of 20 near-complete archaeal MAGs recovered in the current study. (Newick)

**File Name:** Supplementary Data 8

**Description:** Phylogenetic tree of 1,781 near-complete bacterial genomes that were representative genomes of 95% ANI clusters formed from 8,160 rumen-specific microbial genomes. (Newick)

**File Name:** Supplementary Data 9

**Description:** Phylogenetic tree of 35 near-complete archaeal genomes that were representative genomes of 95% ANI clusters formed from 8,160 rumen-specific microbial genomes. (Newick)

**File Name:** Supplementary Data 10

**Description:** Phylogenetic tree of 1,766 near-complete Firmicutes genomes identified from the 8,160 rumen-specific microbial genomes. (Newick)

**File Name:** Supplementary Data 11

**Description:** Phylogenetic tree of 85 near-complete archaeal genomes identified from the 8,160 rumen-specific microbial genomes. (Newick)

**File Name:** Supplementary Data 12

**Description:** Phylogenetic tree of 120 near-complete rumen bacterial genomes encoding lanthipeptide BGCs. (Newick)
